# Supplementary material for: Mesoporous Magnetic Gold “Nanoclusters” as Theranostic Carrier for Chemo-Photothermal Co-therapy of Breast Cancer
Source: PubMed Central journal article supplement — Theranostics. 2014 Apr 4;4(7):678–92. doi: 10.7150/thno.7869 (PMC4038750; doi:10.7150/thno.7869), 2014-04-04
Supplement: thnov04p0678s1.pdf [file thnov04p0678s1.pdf]

# Supplementary Information

## Mesoporous Magnetic Gold “NanoClusters” as Theranostic Carrier for Chemo-Photothermal Co-therapy of Breast Cancer

JinRong Peng<sup>a†</sup>, TingTing Qi<sup>a†</sup>, JinFeng Liao<sup>a†</sup>, BingYang Chu<sup>a</sup>, Qian Yang<sup>a</sup>, Ying Qu<sup>a</sup>,  
WenTing Li<sup>a</sup>, He Li<sup>b</sup>, Feng Luo<sup>a</sup>, ZhiYong Qian<sup>a\*</sup>

<sup>a</sup> State Key Laboratory of Biotherapy, West China Hospital, West China Medical School, Sichuan University, Chengdu 610041, PR China

<sup>b</sup> School of Chemistry and Chemical Engineering, University of Jinan, Jinan 250022, PR China

Address correspondence to Zhiyong Qian, Sichuan University, Anderson-qian@163.com; Fax: +86-28-85164060; Tel: +86-28-85164063

### 1. Supplementary Table

**Table S1** N, Fe and Au contents of MFeNCs and MMGNCs

| Element |                    | EA (%) | EDX (%)      | ICP-AES (%) |
|---------|--------------------|--------|--------------|-------------|
| N       | MFeNCs without PEI | 0.44   | 0.27         | —           |
|         | MFeNCs with PEI    | 3.27   | 3.64         | —           |
| Fe      | MFeNCs with PEI    | —      | 37.20 ± 0.85 | —           |
| Au      | MFe NCs with PEI   | —      | 0            | —           |
| Fe      | MMGNCs             | —      | 34.48±1.36   | 32.73±2.77  |
| Au      | MMGNCs             | —      | 16.21±1.02   | 14.60±2.18  |

## 2. Supplementary Figures

### 2.1 figure captions

**Figure S1** FT-IR spectrum of sodium alginate (a), MFeNCs without PEI (b), MFeNCs with PEI (c), MMGNCs (d)

**Figure S2** HE staining of the hearts from the mice with different treatments, no heart cytotoxicity was observed. Scale bar = 50  $\mu\text{m}$ . (The capital letter marks correspondent to Figure 5)

### 2.2 Figures

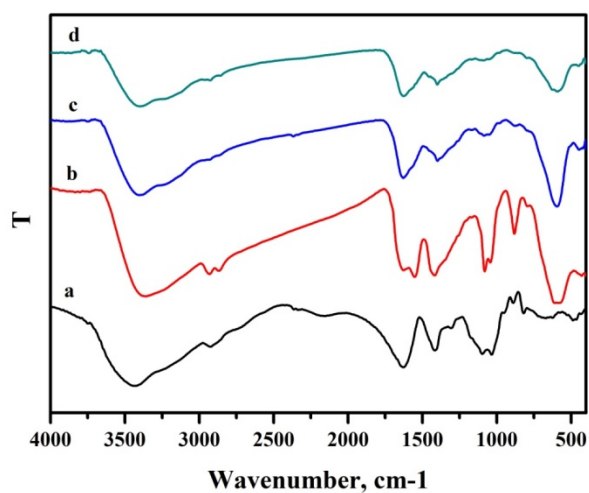

**Figure S1** FT-IR spectrum of sodium alginate (a), MFeNCs without PEI (b), MFeNCs with PEI (c), MMGNCs (d)

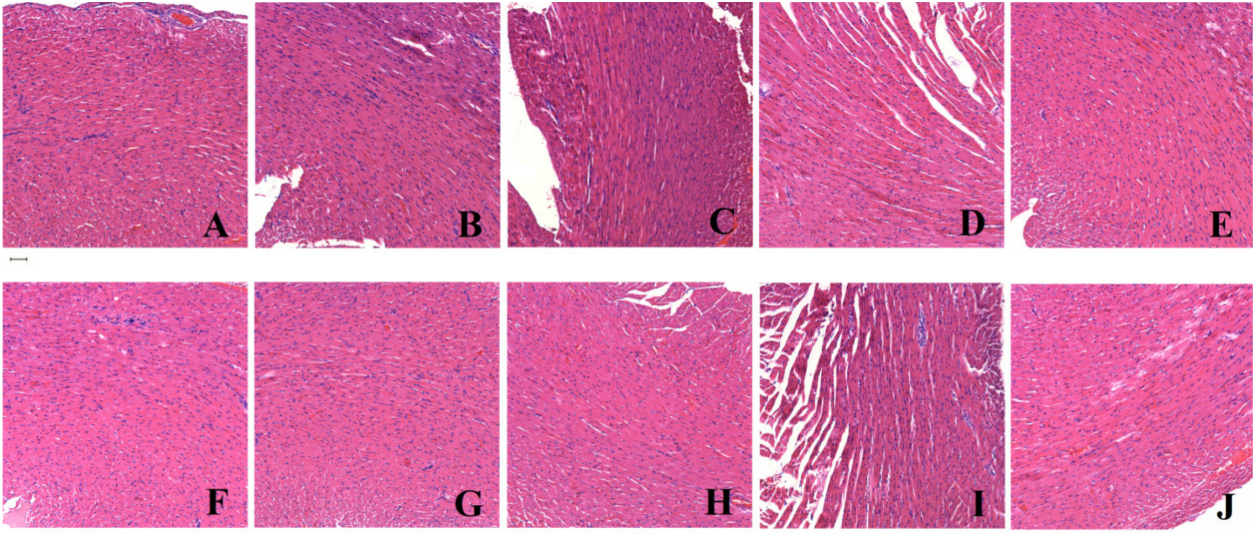

**Figure S2** HE staining of the hearts from the mice with different treatments, no heart cytotoxicity was observed. Scale bar = 50  $\mu$ m. (The capital letter marks corresponding to Figure 5)
